# Supplementary material for: Decline of Lung Function in Knee and Spine Osteoarthritis in the Korean Population: Cross-Sectional Analysis of Data from the Korea National Health and Nutrition Examination Survey
Source: MDPI journal article supplement (doi:10.3390/healthcare10040736), 2022-04-15
Supplement: s1 [file s1]

Supplementary

Table S1. Multivariate-adjusted ORs (95% CIs) for variables related with the presence of OA

| Parameters                                            | Knee OA |               |                    | Spine OA |               |                 |
|-------------------------------------------------------|---------|---------------|--------------------|----------|---------------|-----------------|
|                                                       | OR      | 95% CI        | <i>p</i><br>value* | OR       | 95% CI        | <i>p</i> value* |
| Age                                                   | 1.111   | 1.091 – 1.132 | <0.001             | 1.091    | 1.068 – 1.115 | <0.001          |
| Sex (ref: female)                                     | 0.483   | 0.329 – 0.709 | <0.001             |          |               |                 |
| Body mass index                                       | 1.193   | 1.145 – 1.242 | <0.001             |          |               |                 |
| Smoking (ref: non-smoker) <sup>†</sup>                |         |               |                    |          |               |                 |
| Ex-smoker                                             | 0.660   | 0.435 – 1.001 | 0.849              |          |               |                 |
| Current smoker                                        | 0.950   | 0.562 – 1.607 | 0.153              |          |               |                 |
| Alcohol consumption (ref: non-alcoholic)              |         |               |                    |          |               |                 |
| <sup>†</sup>                                          |         |               |                    |          |               |                 |
| Alcoholic                                             | 0.982   | 0.703 – 1.373 | 0.916              | 1.002    | 0.700 – 1.434 | 0.990           |
| Hypertension (ref: none) <sup>†</sup>                 | 1.315   | 1.028 – 1.683 | 0.029              | 1.255    | 0.923 – 1.707 | 0.146           |
| Bronchial asthma (ref: none) <sup>†</sup>             | 1.953   | 1.102 – 3.460 | 0.022              |          |               |                 |
| Myocardial infarction/angina (ref: none) <sup>†</sup> |         |               |                    | 1.548    | 0.783 – 3.061 | 0.207           |
| Diabetes mellitus (ref: none) <sup>†</sup>            |         |               |                    | 0.365    | 0.907 – 2.055 | 0.135           |
| COPD (ref: none)                                      |         |               |                    | 0.995    | 0.672 – 1.474 | 0.979           |

Abbreviation: OR, odds ratio; CI, confidence interval; OA, osteoarthritis; COPD, chronic obstructive pulmonary disease

\**p* values were obtained by the composite sample multivariate logistic regression analysis.

<sup>†</sup>Missing data were excluded from the analyses: for smoking, *n* = 19; for alcohol consumption, *n* = 18; comorbidities (hypertension, myocardial infarction/angina, bronchial asthma, and diabetes mellitus), *n* = 16.

Table S2. Comparison of lung functions between OA with both knee and spine and controls

|                           | Controls<br>(n = 1198) | Knee OA<br>(n = 414) | Spine OA<br>(n = 394) | OA with both<br>knee and spine<br>(n = 323) | <i>p</i> value<br>(Control vs. both<br>knee and spine<br>OA) | <i>p</i> value<br>(Knee OA vs.<br>both knee and<br>spine OA) | <i>p</i> value<br>(Spine OA vs.<br>both knee and<br>spine OA) |
|---------------------------|------------------------|----------------------|-----------------------|---------------------------------------------|--------------------------------------------------------------|--------------------------------------------------------------|---------------------------------------------------------------|
| Spirometry                |                        |                      |                       |                                             |                                                              |                                                              |                                                               |
| FVC (L)                   | 3.56 (0.03)            | 3.18 (0.05)          | 3.41 (0.06)           | 2.93 (0.05)                                 | <0.001                                                       | <0.001                                                       | <0.001                                                        |
| FVC (%)                   | 92.2 (0.48)            | 91.1 (0.6)           | 92.3 (0.7)            | 91.62 (0.77)                                | 0.824                                                        | 0.174                                                        | 0.902                                                         |
| FEV <sub>1</sub> (L)      | 2.71 (0.02)            | 2.42 (0.04)          | 2.52 (0.05)           | 2.19 (0.04)                                 | <0.001                                                       | <0.001                                                       | <0.001                                                        |
| FEV <sub>1</sub> (%)      | 90.3 (0.5)             | 91.9 (0.8)           | 91.0 (1.0)            | 94.13 (0.97)                                | <0.001                                                       | 0.025                                                        | 0.002                                                         |
| FEV <sub>1</sub> /FVC (%) | 0.76 (0.00)            | 0.76 (0.00)          | 0.74 (0.01)           | 0.75 (0.01)                                 | 0.001                                                        | 0.022                                                        | 0.391                                                         |

Abbreviation: FVC, forced vital capacity; FEV<sub>1</sub>, forced expiratory volume in one second; COPD, chronic obstructive pulmonary disease; OA, osteoarthritis  
*p* values were compared to controls and obtained by two sample t-test or chi-square test.
